# Supplementary material for: Pinoresinol targets NF-kB alongside STAT3 pathway to attenuate IL-6-induced inflammation
Source: Research Square preprint supplement (doi:10.21203/rs.3.rs-3900297/v1), 2024-01-30
Supplement: Supplementary file 1 [file d4d80bf70605a61094c1d489.docx]

***Research article:***

**Pinoresinol targets NF-kB alongside STAT3 pathway to attenuate IL-6-induced inflammation**

Anupam Dutta, Dorothy Das, Rituraj Chakraborty, Bhargab Jyoti Baruah, Manoj Sharma, Pushpa Sharma, M. V. Satish Kumar and Rupak Mukhopadhyay*

Department of Molecular Biology and Biotechnology, Tezpur University,

Assam 784028, India

*** Corresponding Author**

Dr. Rupak Mukhopadhyay

Associate Professor,

Department of Molecular Biology and Biotechnology,

Tezpur University,

Assam 784028, India.

Email: [mrupak@tezu.ernet.in](mailto:mrupak@tezu.ernet.in)

**
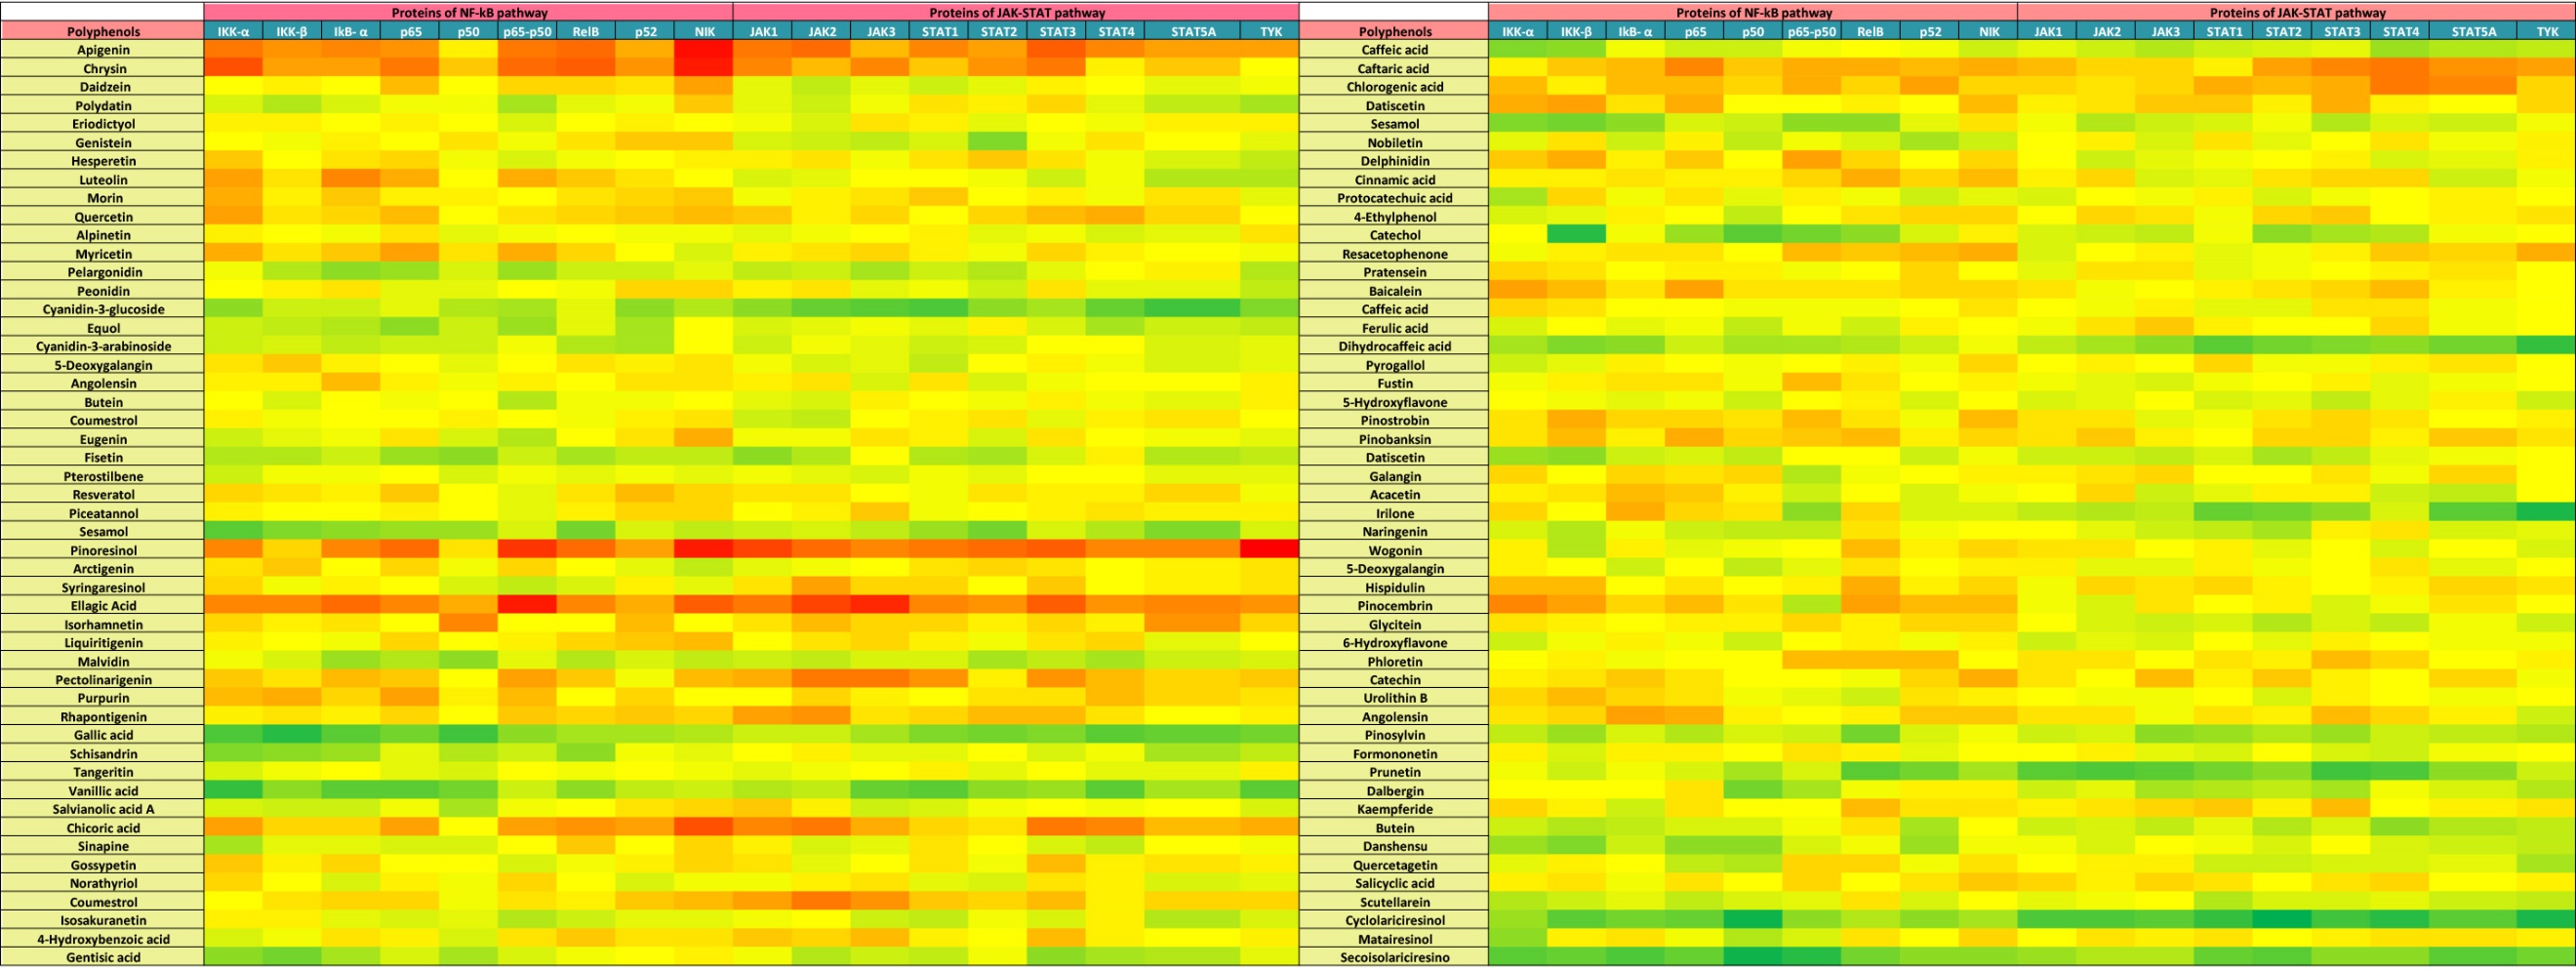
Supplementary Table 1A:** Binding affinities of 100 polyphenols against pivotal proteins of NF-kB and JAK-STAT pathway obtained using AutoDock Vina

**Supplementary Table 1B:** Binding affinities of 100 polyphenols against pivotal proteins of NF-kB and JAK-STAT pathway obtained using HADDOCK web server

**
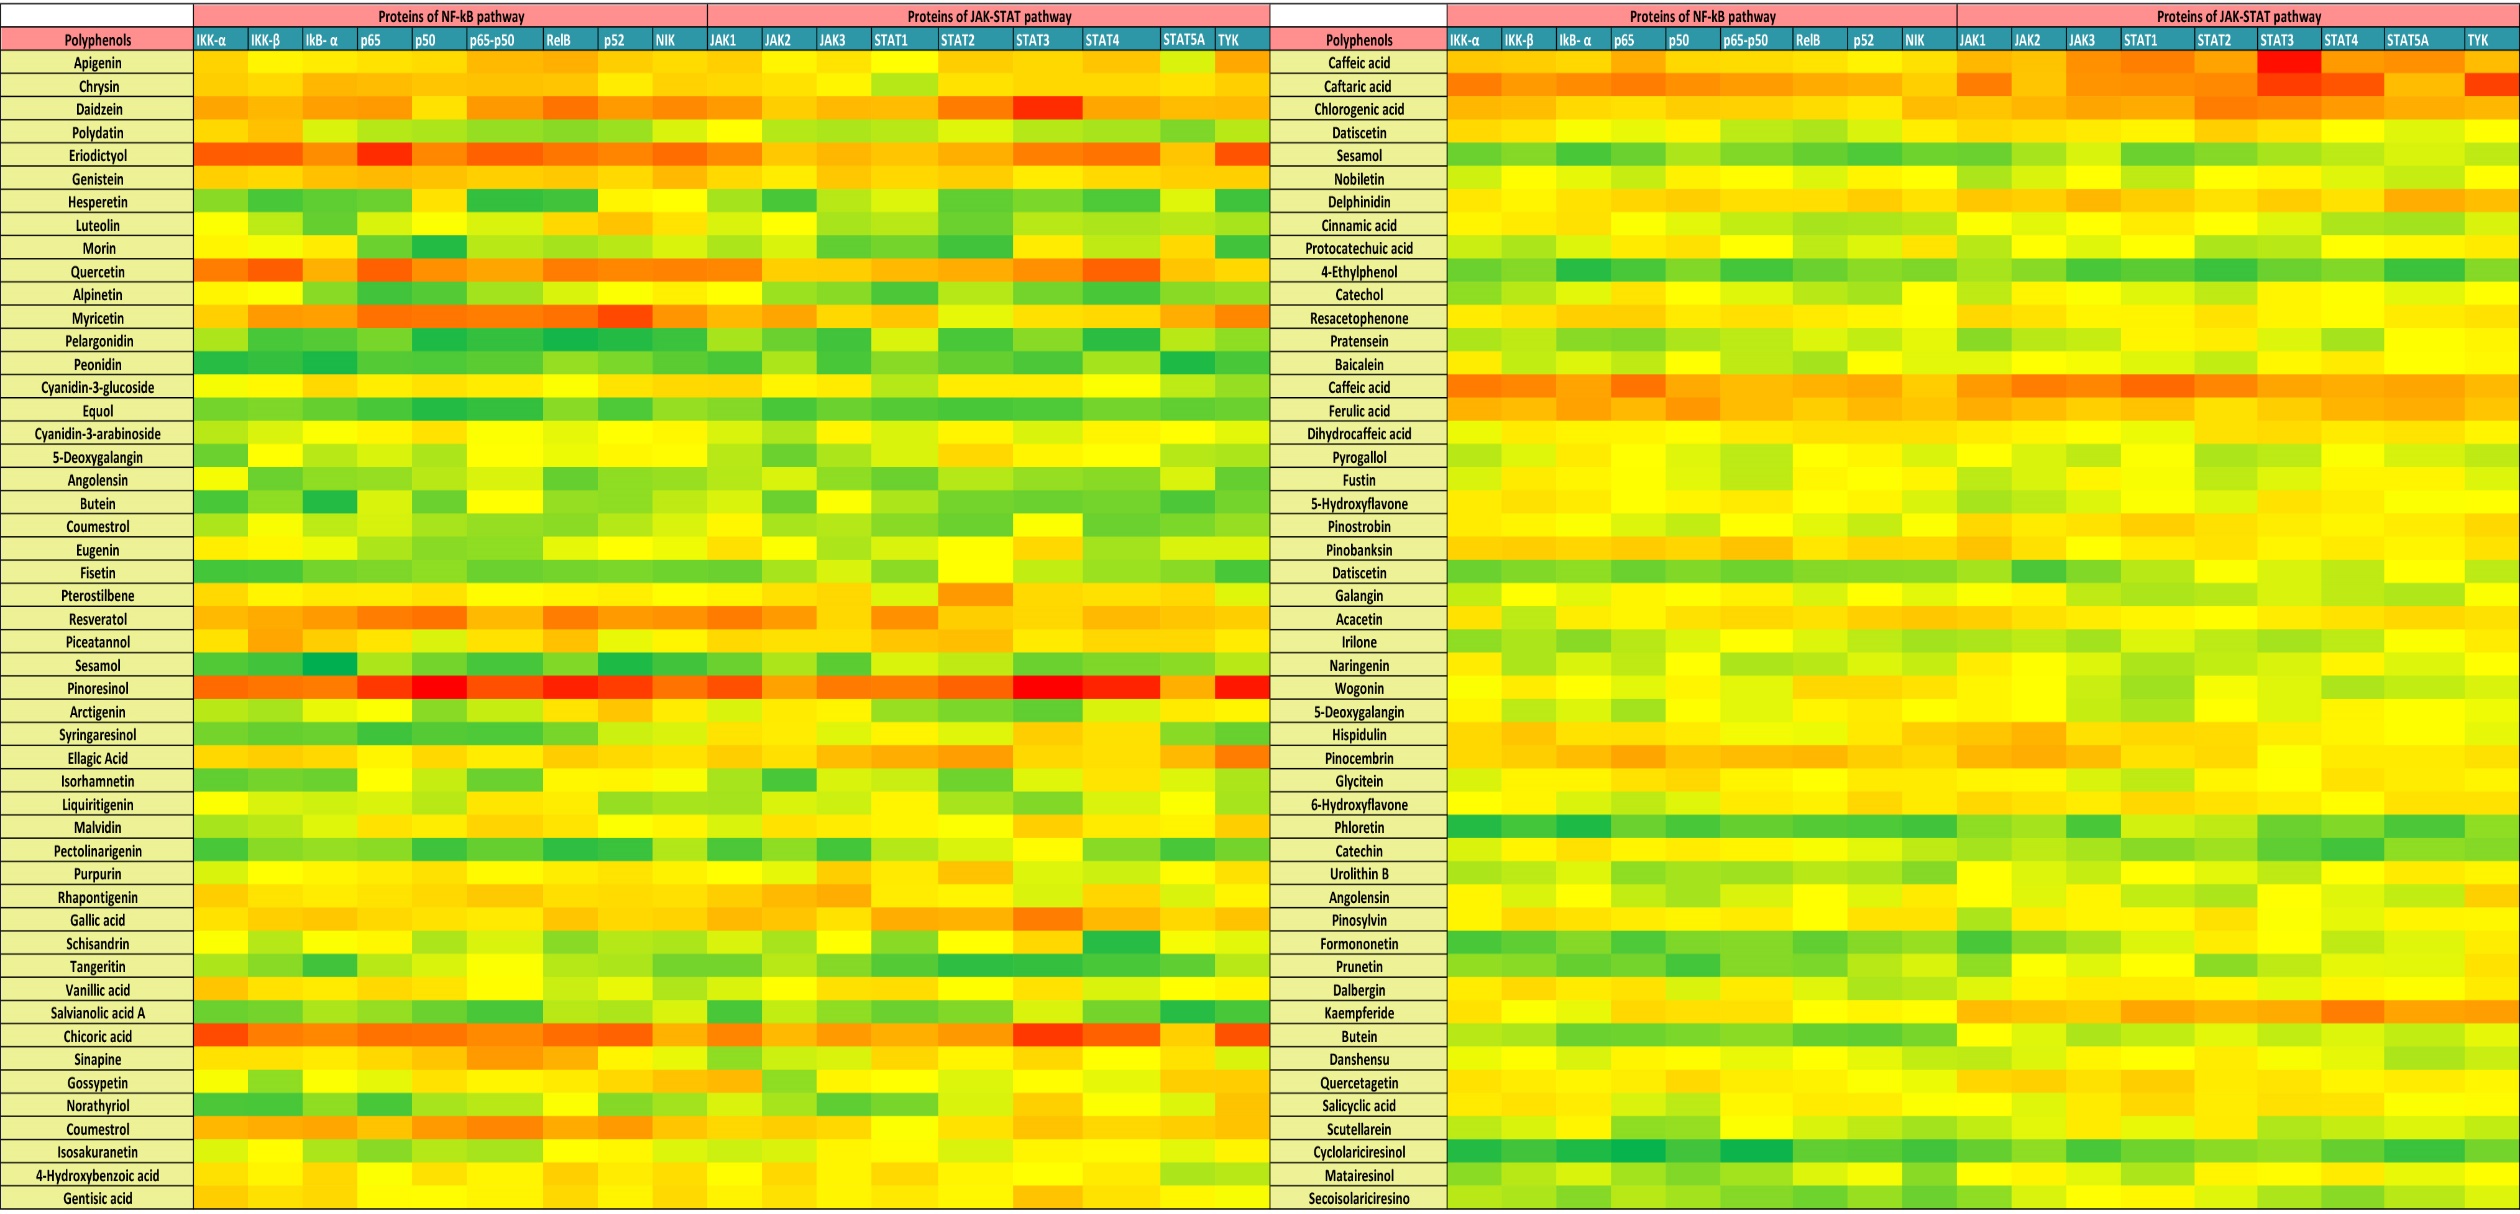
**

**Supplementary Table 2:** The binding scores of pinoresinol against key proteins in the NF-kB and JAK-STAT pathways evaluated using AutoDock Vina and the HADDOCK web server

| **AutoDock Vina** | | | **HADDOCK** | | |
| --- | --- | --- | --- | --- | --- |
| Sl. no | Protein | Score (Kcal/mol) | Sl. no | Protein | HADDCOCK Score |
| 1 | IKK-α | -7.0 | 1 | IKK-α | -28.8 ± 1.3 |
| 2 | IKK-β | -7.0 | 2 | IKK-β | -27.6 ± 0.7 |
| 3 | IkB- α | -6.9 | 3 | IkB- α | -37.8 ± 1.2 |
| 4 | p65 | -7.1 | 4 | p65 | -34.3 ± 3.2 |
| 5 | p50 | -6.2 | 5 | p50 | -40.5 ± 0.9 |
| 6 | p65-p50 heterodimer | -7.5 | 6 | p65-p50 heterodimer | -31.7 ± 3.3 |
| 7 | RelB | -7.1 | 7 | RelB | -36.9 ± 3.6 |
| 8 | p52 | -6.7 | 8 | p52 | -33.8 ± 2.8 |
| 9 | NIK | -7.7 | 9 | NIK | -27.8 ± 4.6 |
| 10 | JAK1 | -7.4 | 10 | JAK1 | -31.7 ± 0.9 |
| 11 | JAK2 | -7.1 | 11 | JAK2 | -22.6 ± 1.1 |
| 12 | JAK3 | -6.9 | 12 | JAK3 | -27.1 ± 3.1 |
| 13 | STAT1 | -7.0 | 13 | STAT1 | -26.6 ± 0.8 |
| 14 | STAT2 | -7.1 | 14 | STAT2 | -29.7 ± 1.9 |
| 15 | STAT3 | -7.2 | 15 | STAT3 | -40.6 ± 4.7 |
| 16 | STAT4 | -6.9 | 16 | STAT4 | -36.7 ± 3.2 |
| 17 | STAT5A | -6.9 | 17 | STAT5A | -21.2 ± 1.6 |
| 18 | TYK | -7.9 | 18 | TYK | -38.0 ± 3.0 |

**Supplementary Table 3:** List of primers and their sequences for amplification of indicated genes

| **Gene Name** | **Forward Primer Sequence (5'-3')** | **Reverse Primer Sequence (3'-5')** |
| --- | --- | --- |
| Β-Actin | CCCTTCATTGACCTCAACTACA | ATGACAAGCTTCCCGTTCTC |
| COX-2 | GTTCCAGACAAGCAGGCTAATA | CCACTCAAGTGTTGCACATAATC |
| TNF-α | CCAGGGACCTCTCTCTAATCA | TCAGCTTGAGGGTTTGCTAC |
| IL-1β | GGTGTTCTCCATGTCCTTTGTA | GCTGTAGAGTGGGCTTATCATC |
| MCP-1 | GCTCGCTCAGCCAGATGCAAT | TGGGTTGTGGAGTGAGTGTTC |
| ICAM-1 | CCGGAAGGTGTATGAACTG | TCCATGGTGATCTCTCCTC |
| VCAM-1 | CATCCACAAAGCTGCAAGAAG | AGGTGCTGTAGATTCCCATTATC |

**
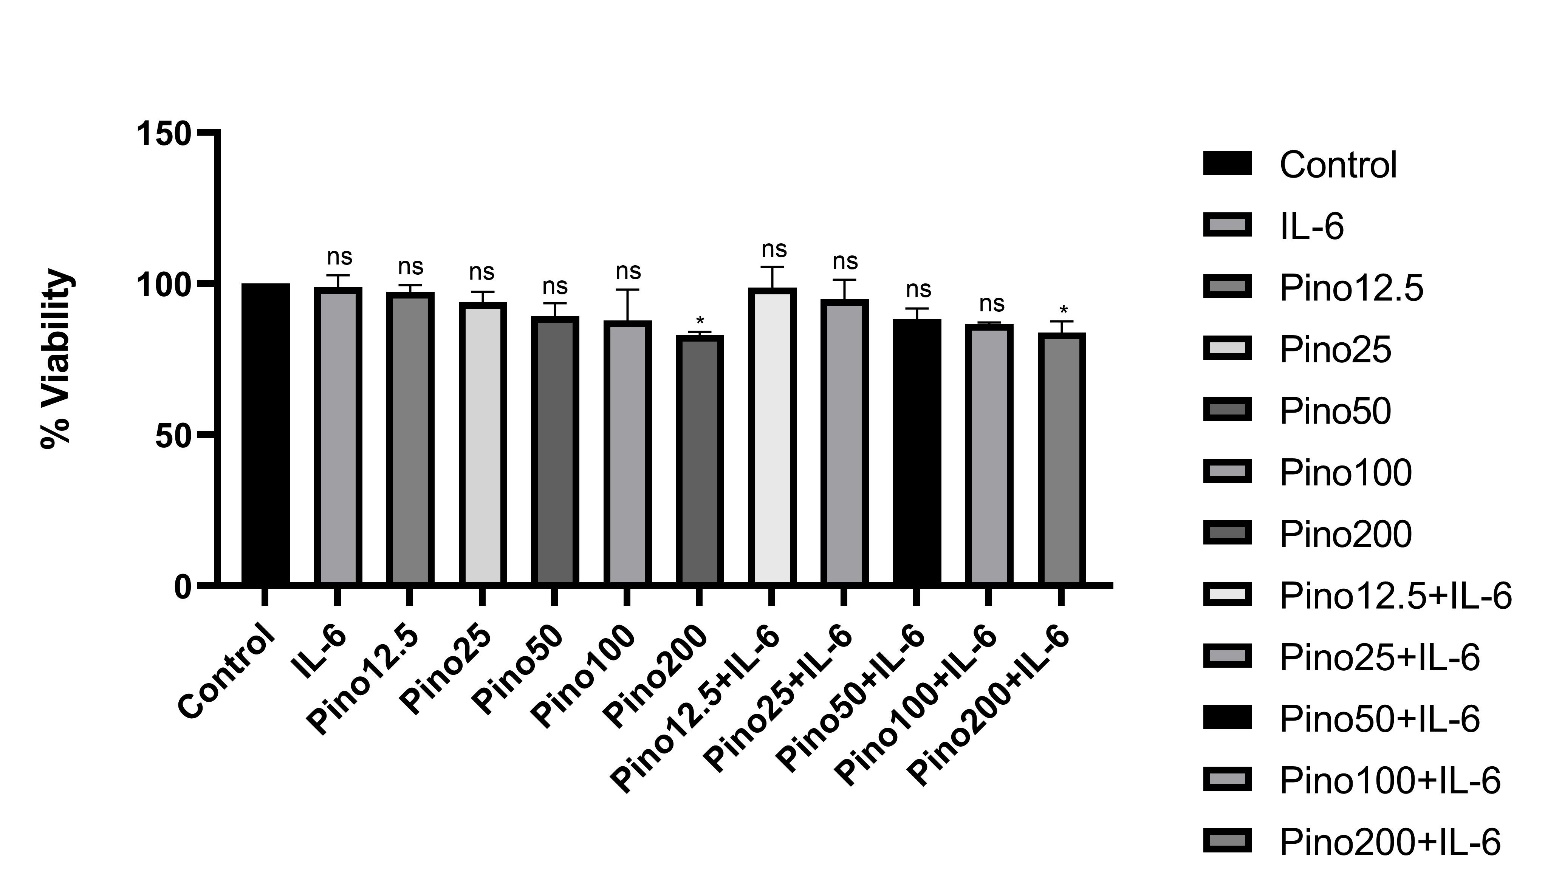
**

**Supplementary fig. 1:** **:** In MTT assay ,THP-1 macrophages were treated with pinoresinol alone at specified concentrations or pre-treated with pinoresinol for 4 hours followed by IL-6 stimulation (50 ng/ml) for 2 hours. Statistical analysis was conducted using unpaired Student's t-test to compare the control group with the different treatments (*), indicating a significant difference. The statistical significance was denoted as * p<0.05.
